# Supplementary material for: Zero-strain Ca0.4Ce0.6VO4 anode material for high capacity and long-life Na-ion batteries
Source: Royal Society of Chemistry journal article supplement (doi:10.1039/d1ta06877f), 2021-01-01
Supplement: d1ta06877f1.pdf [file d1ta06877f1.pdf]

## **Zero-strain $\text{Ca}_{0.4}\text{Ce}_{0.6}\text{VO}_4$ Anode Material for High Capacity and Long-Life Na-Ion Batteries**

*Guisheng Liang<sup>a,b</sup>, Xuhui Xiong<sup>b</sup>, Liting Yang<sup>b</sup>, Xianhu Liu<sup>c</sup>, Renchao Che<sup>\*a,b</sup>*

*<sup>a</sup> Materials Genome Institute, Shanghai University, Shanghai 200444, China*

*<sup>b</sup> Laboratory of Advanced Materials, Shanghai Key Lab of Molecular Catalysis and Innovative Materials, Fudan University, Shanghai 200438, P. R. China*

*<sup>c</sup> School of Materials Science and Engineering, National Engineering Research Center for Advanced Polymer Processing Technology, Henan Province Industrial Technology Research Institute of Resources and Materials, Key Laboratory of Advanced Material Processing & Mold (Ministry of Education), Zhengzhou University, Zhengzhou, 450002, China*

**Table S1.** The XRD Rietveld refinement results of CeVO<sub>4</sub>.

| CeVO <sub>4</sub> (tetragonal, <i>I41/amd</i> )                                                                                |          |          |          |       |            |
|--------------------------------------------------------------------------------------------------------------------------------|----------|----------|----------|-------|------------|
| $R_p = 10.9\%$ $R_{wp} = 14.9\%$ $R_{exp} = 10.18\%$ $\chi^2 = 2.14$                                                           |          |          |          |       |            |
| $a = b = 7.40115 \text{ \AA}$ , $c = 6.50005 \text{ \AA}$ , $\alpha = \beta = \gamma = 90^\circ$ , $V = 356.054 \text{ \AA}^3$ |          |          |          |       |            |
| Atoms                                                                                                                          | <i>x</i> | <i>y</i> | <i>z</i> | sites | Occupation |
| <b>Ce1</b>                                                                                                                     | 0.00000  | 0.75000  | 0.12500  | 4a    | 1.000      |
| <b>V1</b>                                                                                                                      | 0.00000  | 0.25000  | 0.37500  | 4b    | 1.000      |
| <b>O1</b>                                                                                                                      | 0.00000  | 0.42830  | 0.20660  | 16h   | 1.000      |

**Table S2.** The XRD Rietveld refinement results of Ca-CeVO<sub>4</sub>.

| Ca-CeVO <sub>4</sub> (tetragonal, <i>I41/amd</i> )                                                                             |          |          |          |       |            |
|--------------------------------------------------------------------------------------------------------------------------------|----------|----------|----------|-------|------------|
| $R_p = 10.4\%$ $R_{wp} = 13.6\%$ $R_{exp} = 11.09\%$ $\chi^2 = 1.50$                                                           |          |          |          |       |            |
| $a = b = 7.23940 \text{ \AA}$ , $c = 6.40983 \text{ \AA}$ , $\alpha = \beta = \gamma = 90^\circ$ , $V = 335.932 \text{ \AA}^3$ |          |          |          |       |            |
| Atoms                                                                                                                          | <i>x</i> | <i>y</i> | <i>z</i> | sites | Occupation |
| <b>Ca1</b>                                                                                                                     | 0.00000  | 0.75000  | 0.12500  | 4a    | 0.400      |
| <b>Ce1</b>                                                                                                                     | 0.00000  | 0.75000  | 0.12500  | 4a    | 0.600      |
| <b>V1</b>                                                                                                                      | 0.00000  | 0.25000  | 0.37500  | 4b    | 1.000      |
| <b>O1</b>                                                                                                                      | 0.00000  | 0.56852  | 0.801250 | 16h   | 1.000      |

**Table S3.** Mean elemental composition in weight% obtained by ICP-OES CeVO<sub>4</sub> and Ca<sub>0.4</sub>Ce<sub>0.6</sub>VO<sub>4</sub>.

| sample                                              | Ca content (%) | Ce content (%) | V content (%) |
|-----------------------------------------------------|----------------|----------------|---------------|
| CeVO <sub>4</sub>                                   | —              | 56.3           | 20.0          |
| Ca <sub>0.4</sub> Ce <sub>0.6</sub> VO <sub>4</sub> | 7.4            | 39.1           | 23.7          |

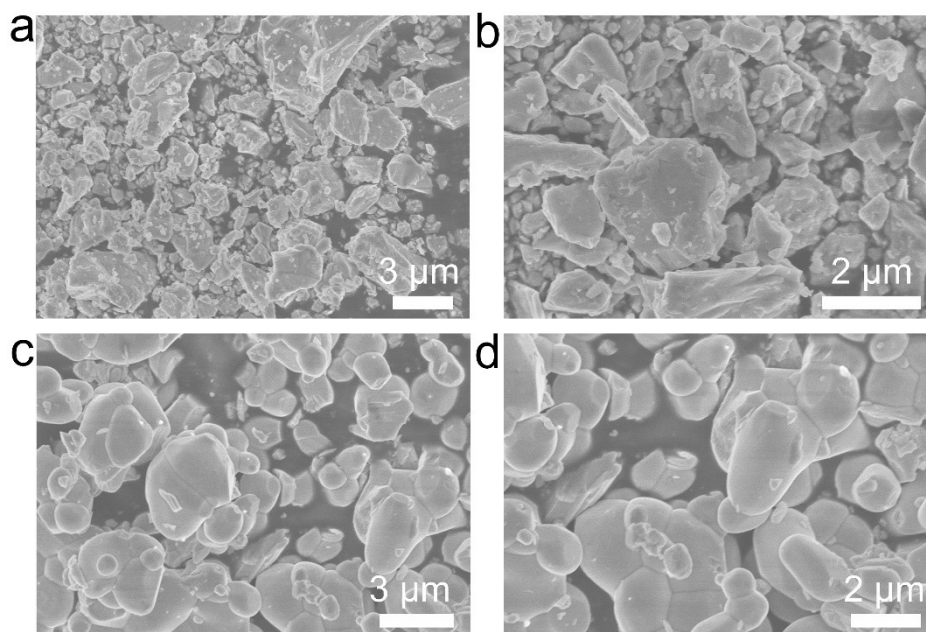

**Fig. S1.** FESEM images of (a, b) Ca-CeVO<sub>4</sub> and (c,d) CeVO<sub>4</sub>.

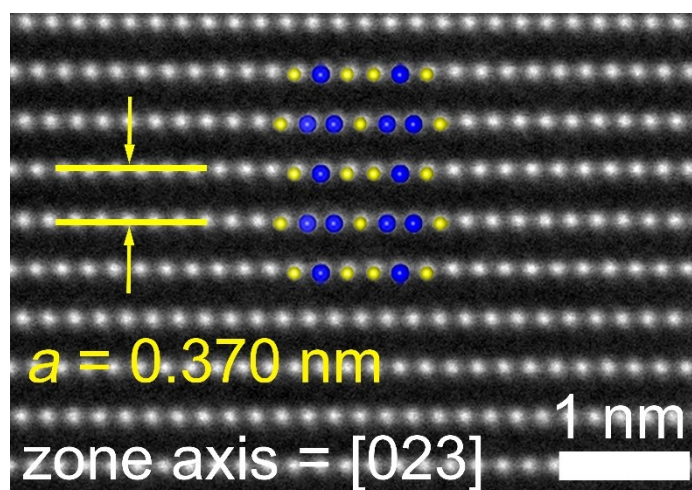

**Fig. S2.** HAADF STEM images of CeVO<sub>4</sub>. The Ce and V atoms are colored by blue and yellow, respectively.

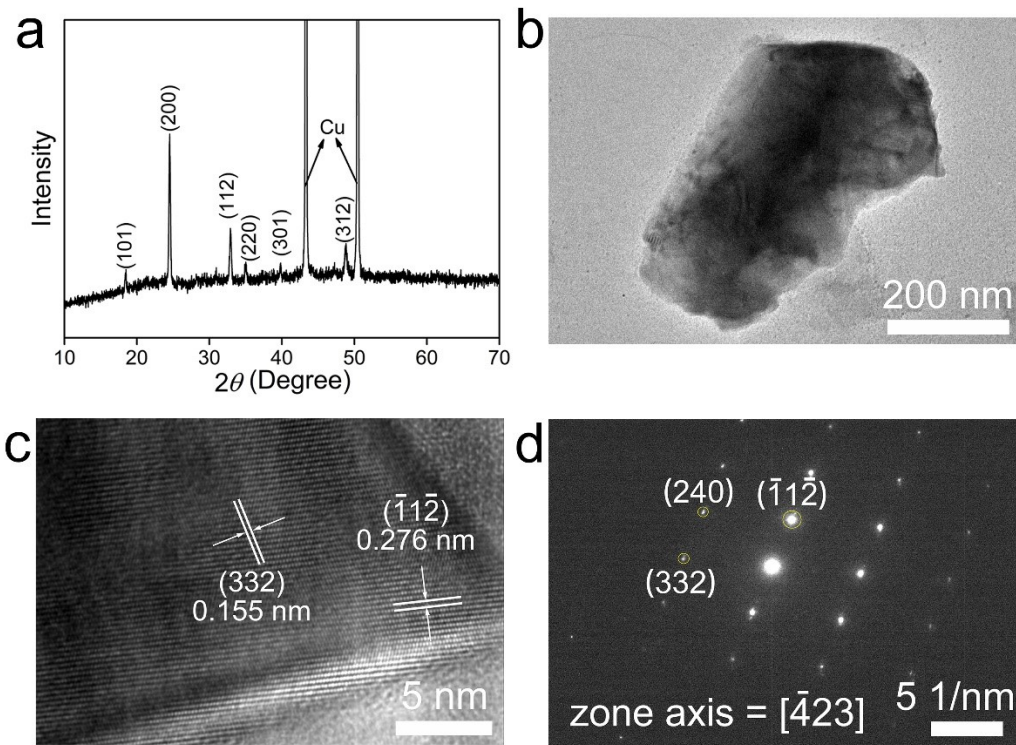

**Fig. S3.** *Ex-situ* (a) XRD pattern, (b) FETEM image and (c) HRTEM image and SAED pattern of Ca-CeVO<sub>4</sub> after long-term cycling. The tested Ca-CeVO<sub>4</sub> sample was obtained through disassembling Ca-CeVO<sub>4</sub>/Na half cell after 2000 cycles at 1500 mA g<sup>-1</sup>.

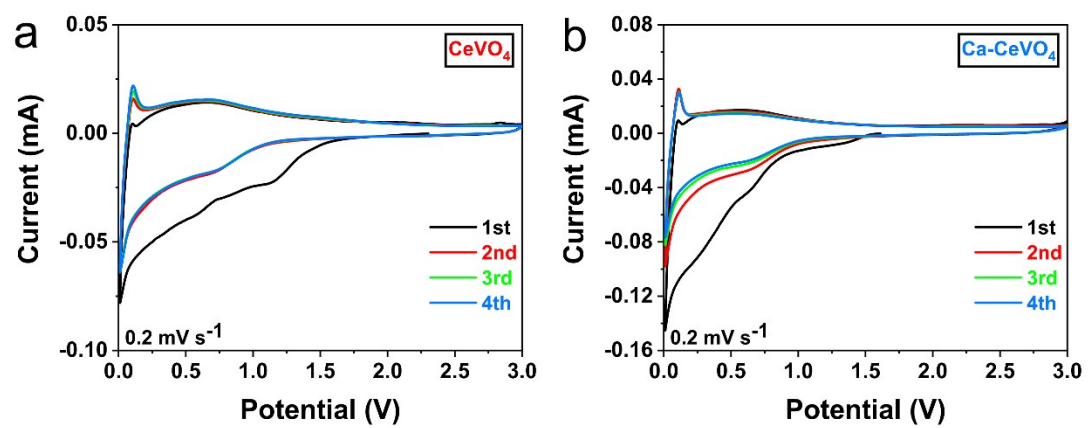

**Fig. S4.** The original four CV curves of (a)  $\text{CeVO}_4$  and (b)  $\text{Ca-CeVO}_4$ .

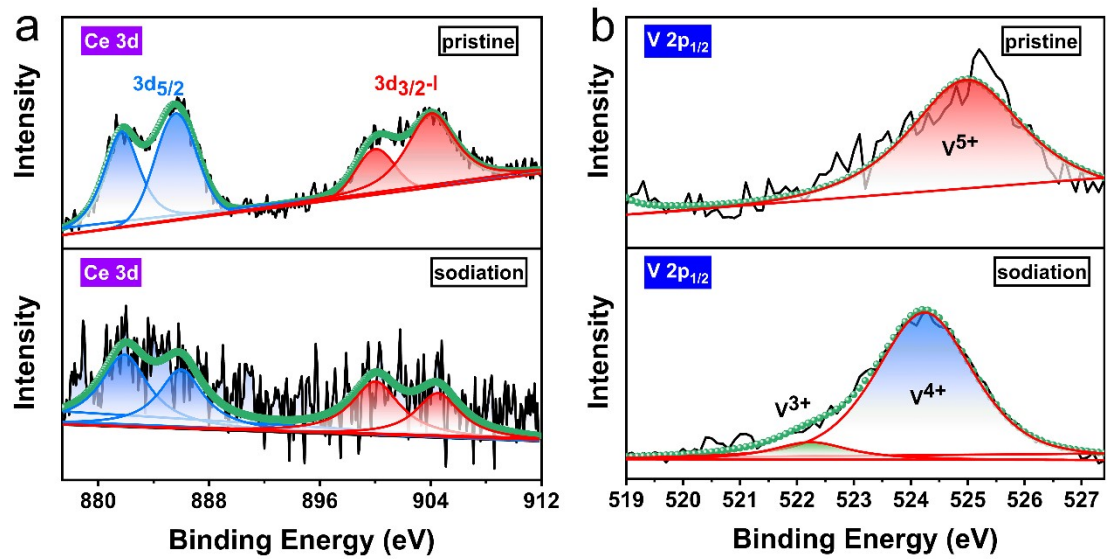

**Fig. S5.** The (a) Ce 3d and (b) V  $2p_{1/2}$  XPS spectra of  $\text{CeVO}_4$  in different sodiation states.

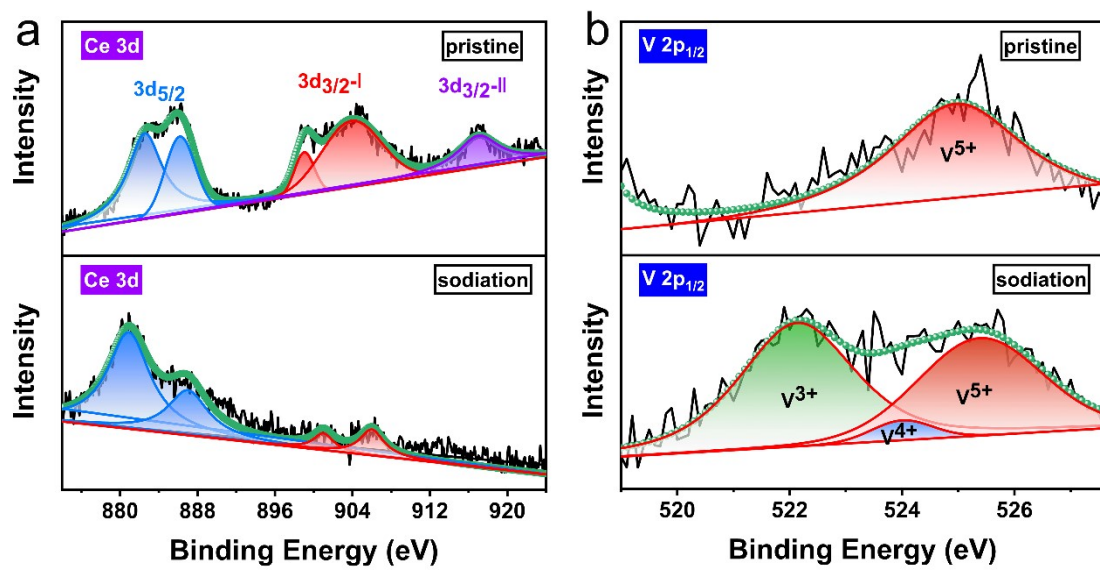

**Fig. S6.** The (a) Ce 3d and (b) V 2p<sub>1/2</sub> XPS spectra of Ca-CeVO<sub>4</sub> in different sodiation states.



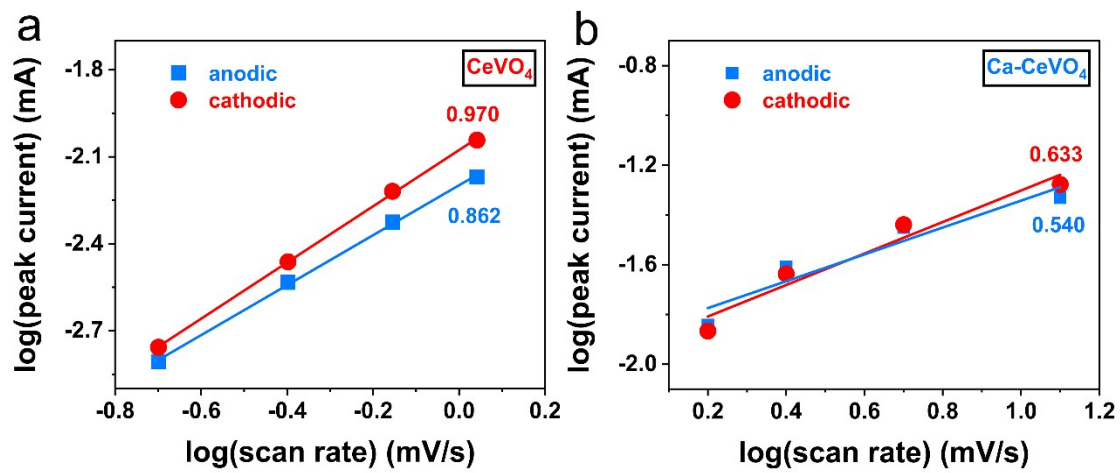

**Fig. S7.** The function with  $\log(\text{peak current})$  vs.  $\log(\text{scan rate})$  for (a)  $\text{CeVO}_4$  and (b)  $\text{Ca-CeVO}_4$ , which is used to determine the value of  $b$ .

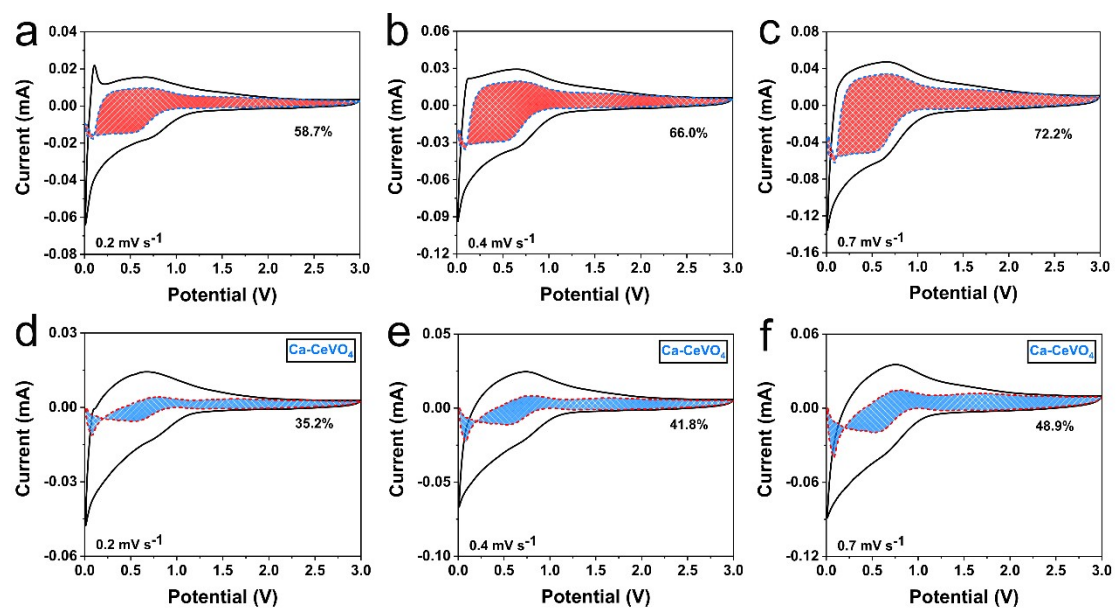

**Fig. S8.** The detailed CV curves with pseudocapacitive contribution at the scan rates of 0.2, 0.4 and 0.7  $\text{mV s}^{-1}$ . **(a, b, c)**  $\text{CeVO}_4$ . **(d, e, f)**  $\text{Ca-CeVO}_4$ .

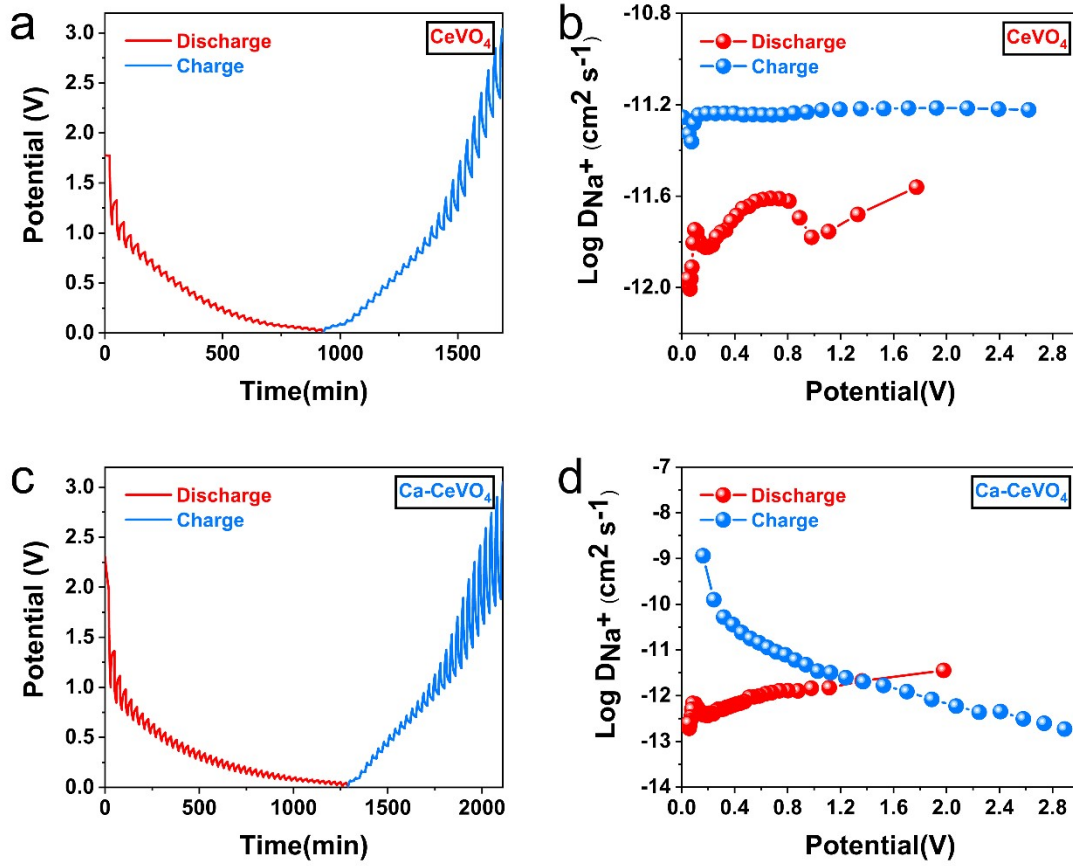

**Fig. S9.** The evaluating of Li<sup>+</sup> diffusion coefficients based on GITT experiments in CeVO<sub>4</sub> and Ca-CeVO<sub>4</sub>. (a, b) GITT curves during the process of discharging and charging. (c, d) The logarithm of calculated Na<sup>+</sup> diffusion coefficients (log  $D_{Na}$ ) changes with the potential (V).

The GITT experiments were also applied to investigate the Na<sup>+</sup> diffusion coefficient ( $D_{Na}$ ) of Ca-CeVO<sub>4</sub> and CeVO<sub>4</sub> (Fig. S8). The times of pulse and intermittence are selected as 10 min and 20 min, respectively (Fig. S9a and c). According to the previous reports, the  $D_{Na}$  in can be determined based on the second Fick's law, as described in Eq. (S1) and (S2)<sup>S1-S4</sup>

$$D_{Na} = \frac{4}{\pi} \left( \frac{m_B V_m}{M_B S} \right)^2 \left( \frac{\Delta E_s}{\tau (dE_\tau / d\sqrt{\tau})} \right)^2 \quad (\tau \ll \frac{L^2}{D}) \quad (S1)$$

$$D_{\text{Na}} = \frac{4}{\pi\tau} \left( \frac{m_B V_m}{M_B S} \right)^2 \left( \frac{\Delta E_s}{\Delta E_\tau} \right)^2 \left( \tau \ll \frac{L^2}{D} \right) \quad (\text{S2})$$

where  $m_B$ ,  $V_m$ ,  $M_B$  and  $S$  is the active materials mass, molar volume, molar mass and electrode contact area, respectively.  $\Delta E_\tau$  and  $\Delta E_s$  represents the potential variation during a single pulse stage and the potential difference between two equilibrium states, respectively. As displayed in **Fig. S9b and d**, the potential during a single pulse process can be fitted to  $\tau^{0.5}$  with a linear function, thus the simplified expression of **Eq.(S2)** can be used for calculating the  $\text{Na}^+$  diffusion coefficients more conveniently. The average  $\text{Na}^+$  diffusion coefficient of  $\text{CeVO}_4$  and  $\text{Ca-CeVO}_4$  is  $3.77 \times 10^{-12} \text{ cm}^2 \text{ s}^{-1}$  and  $7.18 \times 10^{-12} \text{ cm}^2 \text{ s}^{-1}$ , respectively.

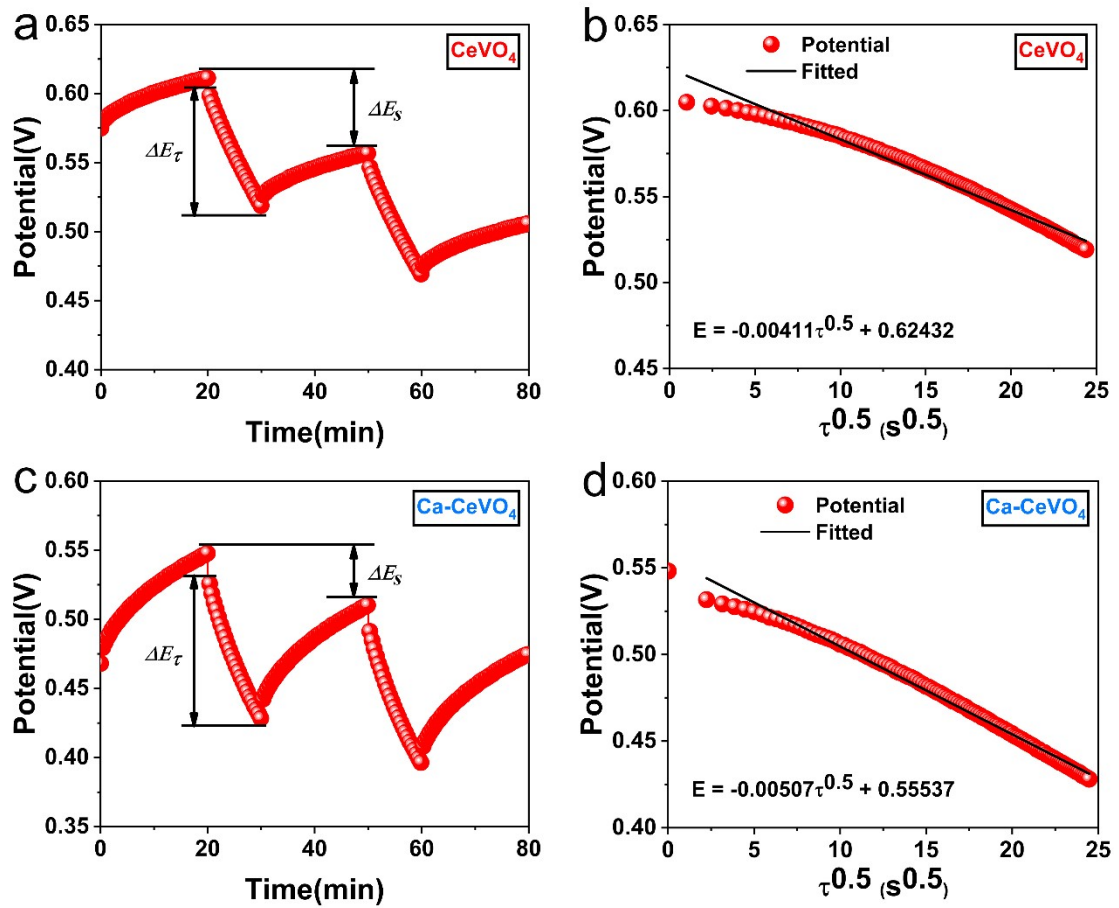

**Fig. S10.** The details the GITT curves of  $\text{CeVO}_4$  and  $\text{Ca-CeVO}_4$ . (a, c) The partial enlarged detail, in which  $\Delta E_\tau$  represents the potential variation during a single pulse stage and  $\Delta E_s$  represents the potential difference between two equilibrium states. (b, d)

The functional relationship between potential and  $\tau^{0.5}$  ( $\tau$  is the symbolization of single pulse time).

## Reference

S1 W. Weppner, *J. Electrochem. Soc.*, 1977, **124**, 1569.

S2 X. Zhu, H. Cao, R. Li, Q. Fu, G. Liang, Y. Chen, L. Luo, C. Lin and X. S. Zhao, *J. Mater. Chem. A*, 2019, **7**, 25537.

S3 Z Hong, Y. Zhen, Y. Ruan, M. Kang, K. Zhou, J. M. Zhang, Z. Huang and M. Wei, *Adv. Mater.*, 2018, 1802035.

S4 A. J. Bard, L. R. Faulkner, *Student Solutions Manual*, 2nd Edition.
